# Supplementary material for: Development and Utilization of a Model System to Evaluate the Potential of Surface Coatings for Protecting Grapes from Volatile Phenols Implicated in Smoke Taint
Source: MDPI journal article supplement (doi:10.3390/molecules26175197), 2021-08-27
Supplement: s1 [file s1]

# **Development and utilization of a model system to evaluate the potential of surface coatings for protecting grapes from volatile phenols implicated in smoke taint**

**Julie A. Culbert <sup>1,\*</sup>, Mark P. Krstic <sup>1</sup>, and Markus J. Herderich <sup>1</sup>**

<sup>1</sup> The Australian Wine Research Institute, PO Box 197, Glen Osmond, SA, 5064, Australia [julie.culbert@awri.com.au](mailto:julie.culbert@awri.com.au) (J.C.); [mark.krstic@awri.com.au](mailto:mark.krstic@awri.com.au) (M.K.); [markus.herderich@awri.com.au](mailto:markus.herderich@awri.com.au) (M.H.);

\* Correspondence: [julie.culbert@awri.com.au](mailto:julie.culbert@awri.com.au) (J.C.); Tel.: +61-8-8313-6600

**Table S1.** Concentrations of volatile phenols ( $\mu\text{g/kg}$ ) in Muscat Gordo grape homogenates after grapes were covered with various surface coatings and exposed to gaseous volatile phenols for 60 hours (experiment 1)

| Treatment                         | Concentration ( $\mu\text{g/kg}$ ) |                    |                   |               | Total             |
|-----------------------------------|------------------------------------|--------------------|-------------------|---------------|-------------------|
|                                   | Guaiacol                           | <i>o</i> -Cresol   | <i>m</i> -Cresol  | Syringol      |                   |
| Control (uncoated/no VP exposure) | <1                                 | <1                 | <1                | <2            | <2                |
| Control (uncoated/VP exposed)     | 80 $\pm$ 16.6 b                    | 219 $\pm$ 51.0 c   | 49 $\pm$ 14.0 b   | <2            | 348 $\pm$ 81.4 b  |
| Biopest®                          | 196 $\pm$ 51.7 a                   | 569 $\pm$ 98.2 a   | 133 $\pm$ 32.8 a  | <2            | 898 $\pm$ 182.1 a |
| Carbon <sup>a</sup>               | 72 $\pm$ 15.2 b                    | 202 $\pm$ 44.2 c   | 40 $\pm$ 11.5 b   | <2            | 314 $\pm$ 70.9 b  |
| Deccoshield®                      | 87 $\pm$ 17.0 b                    | 270 $\pm$ 53.1 bc  | 60 $\pm$ 13.8 ab  | <2            | 417 $\pm$ 83.1 b  |
| Ecoprotector®                     | 115 $\pm$ 21.2 ab                  | 374 $\pm$ 41.2 abc | 89 $\pm$ 16.3 ab  | 2.3 $\pm$ 1.2 | 580 $\pm$ 78.3 ab |
| Envy                              | 71 $\pm$ 7.8 b                     | 211 $\pm$ 7.0 c    | 46 $\pm$ 2.9 b    | <2            | 328 $\pm$ 15.5 b  |
| Fruit drying oil                  | 154 $\pm$ 14.5 ab                  | 473 $\pm$ 50.3 ab  | 104 $\pm$ 12.5 ab | <2            | 731 $\pm$ 76.7 ab |
| Parka Plus                        | 136 $\pm$ 25.6 ab                  | 407 $\pm$ 44.6 abc | 98 $\pm$ 19.1 ab  | 3.7 $\pm$ 2.7 | 645 $\pm$ 89.3 ab |
| Peratec                           | 109 $\pm$ 7.7 ab                   | 333 $\pm$ 12.7 abc | 78 $\pm$ 3.8 ab   | 3 $\pm$ 1.7   | 523 $\pm$ 24.0 ab |
| Raynox®                           | 73 $\pm$ 8.4 b                     | 220 $\pm$ 33.4 c   | 44 $\pm$ 7.8 b    | <2            | 337 $\pm$ 49.3 b  |
| Silicone oil                      | 88 $\pm$ 5.9 b                     | 274 $\pm$ 16.1 bc  | 60 $\pm$ 5.5 b    | <2            | 422 $\pm$ 27.5 b  |
| Surround®WP                       | 100 $\pm$ 2.1 ab                   | 301 $\pm$ 25.8 bc  | 76 $\pm$ 7.0 ab   | <2            | 477 $\pm$ 34.3 ab |
| Titanium dioxide <sup>a</sup>     | 85 $\pm$ 25.5 b                    | 240 $\pm$ 61.3 bc  | 51 $\pm$ 14.7 b   | <2            | 376 $\pm$ 101.3 b |
| <i>P</i>                          | 0.006                              | <0.001             | 0.002             | ns            | <0.001            |

Values are means  $\pm$  standard error of three replicates ( $n = 3$ ); Different letters within columns indicate statistically significant differences between treatment means ( $P = 0.05$ , one-way ANOVA); ns = not significant; Control (uncoated/no VP exposure) is not included in the statistical analysis and values listed are for a single replicate; MSy = 4-methylsyringol. <sup>a</sup>Applied in Raynox®; VP = volatile phenol.

**Table S2.** Concentrations of phenolic glycosides ( $\mu\text{g/kg}$ ) in Muscat Gordo grape homogenates after grapes were covered with various surface coatings and exposed to gaseous volatile phenols for 60 hours (experiment 1)

|                                       |           | Concentration (µg/kg SyGG equivalents) |        |         |         |        |         |       |        |          |         |          |        |        |      |         |           |
|---------------------------------------|-----------|----------------------------------------|--------|---------|---------|--------|---------|-------|--------|----------|---------|----------|--------|--------|------|---------|-----------|
| Treatment                             |           | SyGG                                   | GuGG   | PhGG    | CrGG    | SyPG   | GuPG    | PhPG  | CrPG   | GuRG     | PhRG    | CrRG     | SyMG   | GuMG   | PhMG | CrMG    | Total     |
| Control (uncoated/<br>no VP exposure) |           | 1                                      | <1     | <1      | 4       | <1     | 1       | 3     | 3      | <1       | <1      | 1        | <1     | 2      | <1   | <1      | 15        |
| Control (uncoated/<br>VP exposed)     | Average   | 88 abc                                 | 321 bc | 4.0 abc | 123 d   | 2.8 ab | 197 abc | 38 ab | 299 ab | 10.3 abc | 10.2 ab | 67 bcd   | 3.9 ab | 298 b  | 4.4  | 558 ab  | 2024 cd   |
|                                       | Std Error | 37.1                                   | 133.8  | 1.7     | 44.9    | 0.8    | 54.4    | 11.9  | 91.3   | 4.0      | 3.8     | 22.7     | 1.6    | 106.2  | 1.1  | 228.3   | 728.5     |
| Biopest®                              | Average   | 151 ab                                 | 937 a  | 6.7 abc | 375 ab  | 3.9 ab | 347 ab  | 46 ab | 453 ab | 22.9 a   | 16.0 ab | 149 ab   | 5.2 ab | 723 a  | 14.1 | 1294 a  | 4544 ab   |
|                                       | Std Error | 18.8                                   | 71.7   | 0.4     | 16.5    | 0.5    | 29.8    | 6.0   | 60.6   | 0.5      | 2.5     | 16.1     | 0.7    | 50.1   | 8.0  | 74.8    | 138.0     |
| Carbon <sup>a</sup>                   | Average   | 23.5 c                                 | 216 c  | 1.1 c   | 87 d    | 1.0 b  | 138 c   | 28 b  | 213 b  | 4.8 c    | 6.9 b   | 33 d     | 1.0 b  | 174 b  | 2.0  | 325 b   | 1254 d    |
|                                       | Std Error | 4.7                                    | 37.1   | 0.2     | 23.6    | 0.1    | 15.2    | 0.4   | 33.7   | 0.7      | 1.6     | 7.8      | 0.2    | 32.9   | 0.6  | 63.1    | 159.9     |
| Deccoshield®                          | Average   | 110 abc                                | 367 bc | 5.7 abc | 159 cd  | 3.3 ab | 246 abc | 54 ab | 466 ab | 10.1 abc | 13.4 ab | 94 bcd   | 3.9 ab | 295 b  | 2.7  | 695 ab  | 2525 cd   |
|                                       | Std Error | 10.7                                   | 38.7   | 0.6     | 16.6    | 0.3    | 21.1    | 8.0   | 68.2   | 1.1      | 1.4     | 6.2      | 0.8    | 66.9   | 0.4  | 147.5   | 193.9     |
| Ecoprotector®                         | Average   | 199 a                                  | 729 ab | 10.0 a  | 304 abc | 5.9 a  | 288 abc | 57 ab | 473 ab | 13.9 abc | 17.2 ab | 131 abc  | 6.7 ab | 424 ab | 5.8  | 1010 ab | 3675 abc  |
|                                       | Std Error | 44.2                                   | 26.8   | 3.0     | 36.2    | 0.8    | 63.7    | 13.5  | 125.1  | 2.8      | 1.3     | 8.5      | 1.2    | 67.1   | 1.0  | 90.7    | 438.3     |
| Envy                                  | Average   | 89 abc                                 | 328 bc | 4.3 abc | 121 d   | 2.6 ab | 170 bc  | 37 ab | 270 b  | 6.1 bc   | 8.4 ab  | 64 cd    | 3.1 ab | 187 b  | 2.2  | 485 b   | 1778 cd   |
|                                       | Std Error | 9.2                                    | 45.9   | 0.5     | 4.0     | 0.4    | 20.9    | 2.0   | 42.6   | 1.4      | 0.7     | 6.5      | 0.5    | 30.9   | 0.3  | 60.2    | 79.3      |
| Fruit drying oil                      | Average   | 149 ab                                 | 1035 a | 7.2 abc | 426 a   | 3.7 ab | 385 a   | 71 a  | 655 a  | 20.4 ab  | 21.8 a  | 181 a    | 4.0 ab | 576 ab | 7.2  | 1267 a  | 4809 a    |
|                                       | Std Error | 20.0                                   | 56.6   | 0.8     | 17.6    | 0.3    | 38.2    | 13.6  | 75.4   | 4.4      | 2.7     | 9.8      | 0.5    | 99.8   | 0.7  | 75.0    | 83.2      |
| Parka Plus                            | Average   | 173 a                                  | 688 ab | 8.0 ab  | 363 ab  | 4.7 ab | 267 abc | 42 ab | 456 ab | 18.3 abc | 15.1 ab | 123 abc  | 4.5 ab | 497 ab | 6.3  | 999 ab  | 3665 abc  |
|                                       | Std Error | 27.7                                   | 55.9   | 1.7     | 38.2    | 1.0    | 56.0    | 8.2   | 110.0  | 1.1      | 1.4     | 12.3     | 0.7    | 73.3   | 1.5  | 109.6   | 455.7     |
| Peratec                               | Average   | 195 a                                  | 359 bc | 8.8 a   | 205 bcd | 4.5 ab | 294 abc | 57 ab | 429 ab | 20.7 ab  | 17.8 ab | 124 abc  | 7.6 a  | 513 ab | 10.9 | 1012 ab | 3258 abcd |
|                                       | Std Error | 4.6                                    | 111.9  | 0.2     | 14.4    | 0.2    | 10.6    | 10.3  | 18.8   | 4.0      | 4.2     | 20.3     | 0.1    | 24.8   | 7.2  | 44.2    | 65.8      |
| Raynox®                               | Average   | 103 abc                                | 454 bc | 4.7 abc | 219 bcd | 4.4 ab | 258 abc | 44 ab | 431 ab | 15.0 abc | 14.2 ab | 100 abcd | 5.1 ab | 397 ab | 2.9  | 724 ab  | 2776 bcd  |
|                                       | Std Error | 26.8                                   | 170.9  | 0.9     | 85.2    | 2.1    | 41.7    | 7.5   | 68.7   | 6.5      | 5.9     | 37.8     | 2.8    | 189.8  | 0.4  | 354.6   | 986.9     |
| Silicone oil                          | Average   | 124 abc                                | 399 bc | 6.0 abc | 168 cd  | 3.2 ab | 233 abc | 52 ab | 380 ab | 14.6 abc | 14.2 ab | 99 abcd  | 4.7 ab | 407 ab | 2.4  | 725 ab  | 2632 bcd  |
|                                       | Std Error | 9.3                                    | 22.8   | 0.6     | 9.9     | 0.1    | 32.2    | 4.9   | 52.1   | 1.4      | 1.3     | 1.1      | 0.6    | 32.3   | 0.3  | 90.4    | 203.6     |
| Surround®WP                           | Average   | 168 a                                  | 484 bc | 8.4 ab  | 224 bcd | 4.2 ab | 189 bc  | 40 ab | 320 ab | 12.5 abc | 12.9 ab | 99 abcd  | 5.6 ab | 331 ab | 8.7  | 729 ab  | 2636 bcd  |
|                                       | Std Error | 29.7                                   | 75.7   | 1.6     | 34.1    | 0.6    | 7.8     | 2.0   | 7.0    | 1.8      | 1.2     | 13.7     | 1.2    | 35.8   | 4.5  | 90.9    | 263.4     |
| TiO2 <sup>a</sup>                     | Average   | 49 bc                                  | 237 c  | 2.3 bc  | 110 d   | 1.7 b  | 196 abc | 34 ab | 305 ab | 7.9 abc  | 9.1 ab  | 59 cd    | 2.1 ab | 231 b  | 6.4  | 453 b   | 1704 cd   |
|                                       | Std Error | 6.9                                    | 42.5   | 0.4     | 20.0    | 0.2    | 46.3    | 5.7   | 69.8   | 1.8      | 1.4     | 11.6     | 0.5    | 53.5   | 4.7  | 117.1   | 362.5     |
| P                                     |           | <0.001                                 | <0.001 | 0.001   | <0.001  | 0.013  | 0.004   | ns    | 0.019  | 0.002    | 0.028   | <0.001   | 0.024  | 0.001  | ns   | 0.001   | <0.001    |

Values are means and standard errors of three replicates ( $n = 3$ ) measured as syringol glucose-glucoside equivalents; Different letters within columns indicate statistically significant differences between treatment means ( $P = 0.05$ , one-way ANOVA); ns = not significant; Control (uncoated/no VP exposure) is not included in the statistical analysis and values listed are for a single replicate; Sy = syringol; Gu = guaiacol; Ph = phenol; Cr = cresol; GG = glucose-glucoside (gentiobioside); PG = pentose-glucoside; RG = rutinoid; MG = monoglucoside. <sup>a</sup>Applied in Raynox®; VP = volatile phenol.

**Table S3.** Concentrations of volatile phenols ( $\mu\text{g/kg}$ ) in Muscat Gordo grape homogenates after grapes were covered with various surface coatings and exposed to gaseous volatile phenols for 60 hours (experiment 2)

| Treatment                         | Concentration ( $\mu\text{g/kg}$ ) |                   |                   |             | Total              |
|-----------------------------------|------------------------------------|-------------------|-------------------|-------------|--------------------|
|                                   | Guaiacol                           | <i>o</i> -Cresol  | <i>m</i> -Cresol  | Syringol    |                    |
| Control (uncoated/no VP exposure) | <1                                 | <1                | <1                | <2          | <2                 |
| Control (uncoated/VP exposed)     | 67 $\pm$ 7.9 b                     | 188 $\pm$ 23.9 b  | 42 $\pm$ 6.4 c    | <2          | 297 $\pm$ 38.2 c   |
| Biopest®                          | 143 $\pm$ 21.5 ab                  | 385 $\pm$ 49.4 ab | 86 $\pm$ 12.8 abc | <2          | 614 $\pm$ 81.6 abc |
| Carbon <sup>a</sup>               | 99 $\pm$ 32.6 b                    | 204 $\pm$ 51.1 b  | 48 $\pm$ 14.4 c   | <2          | 351 $\pm$ 98.0 c   |
| Deccoshield®                      | 59 $\pm$ 4.9 b                     | 189 $\pm$ 9.3 b   | 40 $\pm$ 2.6 c    | <2          | 288 $\pm$ 16.5 c   |
| Ecoprotector®                     | 91 $\pm$ 25.8 b                    | 271 $\pm$ 46.9 b  | 60 $\pm$ 11.7 c   | <2          | 422 $\pm$ 83.7 bc  |
| Envy                              | 59 $\pm$ 7.8 b                     | 154 $\pm$ 19.3 b  | 35 $\pm$ 4.5 c    | <2          | 248 $\pm$ 31.1 c   |
| Fruit drying oil                  | 319 $\pm$ 119.4 a                  | 597 $\pm$ 116.0 a | 150 $\pm$ 32.2 a  | <2          | 1066 $\pm$ 267.2 a |
| Parka Plus                        | 230 $\pm$ 24.4 ab                  | 538 $\pm$ 70.0 a  | 131 $\pm$ 26.2 ab | 2 $\pm$ 1.0 | 901 $\pm$ 120.0 ab |
| Peratec                           | 81 $\pm$ 3.3 b                     | 246 $\pm$ 13.1 b  | 59 $\pm$ 4.7 c    | <2          | 386 $\pm$ 20.5 c   |
| Raynox®                           | 79 $\pm$ 9.8 b                     | 234 $\pm$ 18.8 b  | 55 $\pm$ 4.4 c    | <2          | 368 $\pm$ 32.4 c   |
| Silicone oil                      | 93 $\pm$ 12.5 b                    | 269 $\pm$ 25.0 b  | 63 $\pm$ 3.5 bc   | <2          | 425 $\pm$ 40.9 bc  |
| Surround®WP                       | 72 $\pm$ 14.0 b                    | 198 $\pm$ 20.9 b  | 43 $\pm$ 4.0 c    | <2          | 313 $\pm$ 37.3 c   |
| Titanium dioxide <sup>a</sup>     | 71 $\pm$ 5.2 b                     | 210 $\pm$ 19.0 b  | 46 $\pm$ 3.7 c    | <2          | 327 $\pm$ 27.5 c   |
| <i>P</i>                          | 0.001                              | <0.001            | <0.001            | ns          | <0.001             |

Values are means  $\pm$  standard error of three replicates ( $n = 3$ ); Different letters within columns indicate statistically significant differences between treatment means ( $P = 0.05$ , one-way ANOVA); ns = not significant; Control (uncoated/no VP exposure) is not included in the statistical analysis and values listed are for a single replicate; MSy = 4-methylsyringol. <sup>a</sup>Applied in Raynox®; VP = volatile phenol.

**Table S4.** Concentrations of phenolic glycosides ( $\mu\text{g/kg}$ ) in Muscat Gordo grape homogenates after grapes were covered with various surface coatings and exposed to gaseous volatile phenols for 60 hours (experiment 2)

|                                       |           | Concentration ( $\mu\text{g/kg}$ SyGG equivalents) |         |        |        |         |        |      |         |        |      |        |        |         |      |        |          |
|---------------------------------------|-----------|----------------------------------------------------|---------|--------|--------|---------|--------|------|---------|--------|------|--------|--------|---------|------|--------|----------|
| Treatment                             |           | SyGG                                               | GuGG    | PhGG   | CrGG   | SyPG    | GuPG   | PhPG | CrPG    | GuRG   | PhRG | CrRG   | SyMG   | GuMG    | PhMG | CrMG   | Total    |
| Control (uncoated/<br>no VP exposure) |           | 1                                                  | <1      | <1     | 6      | <1      | 1      | 2    | 2       | <1     | <1   | 2      | <1     | 3       | <1   | <1     | 17       |
| Control (uncoated/<br>VP exposed)     | Average   | 52 ab                                              | 305 bc  | 2.5 ab | 114 b  | 2.1 c   | 78 b   | 18.1 | 124 bc  | 6.7 a  | 7.8  | 48 bc  | 1.1 ab | 118 c   | 2.8  | 327 b  | 1207 bc  |
|                                       | Std Error | 12.4                                               | 18.1    | 0.5    | 7.0    | 0.4     | 2.4    | 1.0  | 9.6     | 0.7    | 0.9  | 4.7    | 0.3    | 18.7    | 0.8  | 44.2   | 86.0     |
| Biopest®                              | Average   | 92 ab                                              | 729 abc | 4.4 ab | 312 ab | 3.1 abc | 246 a  | 33.6 | 326 ab  | 13.5 a | 10.9 | 94 ab  | 2.3 ab | 430 a   | 4.4  | 914 ab | 3215 ab  |
|                                       | Std Error | 15.6                                               | 31.4    | 0.9    | 10.9   | 0.5     | 23.4   | 4.9  | 40.2    | 1.4    | 1.3  | 6.3    | 0.4    | 17.0    | 1.6  | 89.1   | 148.1    |
| Carbon <sup>a</sup>                   | Average   | 20 b                                               | 230 c   | 1.1 b  | 106 b  | 1.2 c   | 74 b   | 18.8 | 103 c   | 5.8 a  | 7.4  | 32 c   | 0.5 b  | 141 c   | 2.3  | 326 b  | 1069 c   |
|                                       | Std Error | 6.0                                                | 63.3    | 0.3    | 30.1   | 0.4     | 5.6    | 1.9  | 2.3     | 2.3    | 2.4  | 8.8    | 0.1    | 34.1    | 1.0  | 54.7   | 211.7    |
| Deccoshield®                          | Average   | 85 ab                                              | 399 abc | 4.2 ab | 190 ab | 2.7 bc  | 138 ab | 30.8 | 231 abc | 7.6 a  | 9.1  | 63 abc | 1.5 ab | 176 c   | 2.9  | 496 ab | 1837 abc |
|                                       | Std Error | 6.7                                                | 28.3    | 0.4    | 21.7   | 0.4     | 12.9   | 3.3  | 31.0    | 0.2    | 1.0  | 2.9    | 0.3    | 21.6    | 0.1  | 40.8   | 145.8    |
| Ecoprotector®                         | Average   | 83 ab                                              | 449 abc | 3.7 ab | 217 ab | 3.4 abc | 159 ab | 31.0 | 242 abc | 11.7 a | 10.6 | 76 abc | 1.6 ab | 281 abc | 2.1  | 659 ab | 2230 abc |
|                                       | Std Error | 1.1                                                | 49.1    | 0.1    | 21.4   | 0.4     | 17.4   | 3.7  | 19.5    | 3.2    | 2.6  | 14.3   | 0.1    | 32.1    | 0.4  | 49.4   | 171.5    |
| Envy                                  | Average   | 58 ab                                              | 297 bc  | 3.1 ab | 126 b  | 2.2 c   | 118 ab | 27.4 | 160 abc | 7.4 a  | 9.1  | 60 abc | 1.2 ab | 138 c   | 1.8  | 380 b  | 1389 bc  |
|                                       | Std Error | 18.4                                               | 87.3    | 1.0    | 41.1   | 0.5     | 22.6   | 0.8  | 14.1    | 2.4    | 2.0  | 14.9   | 0.3    | 46.2    | 0.4  | 88.3   | 326.4    |
| Fruit drying oil                      | Average   | 88 ab                                              | 897 a   | 4.4 ab | 354 ab | 3.9 abc | 200 ab | 35.9 | 305 abc | 9.9 a  | 14.7 | 100 ab | 1.7 ab | 238 abc | 4.7  | 869 ab | 3126 abc |
|                                       | Std Error | 15.5                                               | 294.2   | 0.7    | 114.2  | 0.8     | 69.8   | 5.3  | 82.6    | 2.1    | 2.8  | 21.0   | 0.4    | 73.4    | 1.5  | 249.9  | 923.7    |
| Parka Plus                            | Average   | 157 a                                              | 877 ab  | 8.2 a  | 433 a  | 5.9 ab  | 221 ab | 36.4 | 352 a   | 11.7 a | 12.2 | 105 ab | 3.1 a  | 377 ab  | 6.3  | 1054 a | 3660 a   |
|                                       | Std Error | 37.6                                               | 107.7   | 2.2    | 43.4   | 1.0     | 37.7   | 4.2  | 32.9    | 1.3    | 1.3  | 14.8   | 1.1    | 25.9    | 0.9  | 184.4  | 397.6    |
| Peratec                               | Average   | 79 ab                                              | 350 abc | 3.8 ab | 160 ab | 2.9 abc | 98 ab  | 23.4 | 172 abc | 7.8 a  | 8.9  | 56 abc | 1.8 ab | 193 bc  | 3.5  | 521 ab | 1681 abc |
|                                       | Std Error | 13.6                                               | 18.0    | 0.8    | 19.4   | 0.3     | 7.5    | 2.9  | 7.5     | 0.4    | 1.2  | 3.9    | 0.4    | 5.7     | 1.6  | 26.7   | 73.9     |
| Raynox®                               | Average   | 117 ab                                             | 494 abc | 6.0 ab | 207 ab | 4.3 abc | 145 ab | 31.7 | 230 abc | 10.5 a | 12.1 | 78 abc | 2.3 ab | 214 bc  | 3.1  | 636 ab | 2191 abc |
|                                       | Std Error | 3.9                                                | 12.1    | 0.4    | 10.7   | 0.4     | 26.3   | 5.3  | 32.7    | 2.1    | 1.9  | 5.4    | 0.1    | 24.5    | 0.4  | 60.3   | 121.5    |
| Silicone oil                          | Average   | 165 a                                              | 758 abc | 8.0 a  | 348 ab | 6.1 a   | 190 ab | 32.7 | 307 abc | 12.6 a | 11.8 | 110 a  | 3.3 a  | 310 abc | 4.6  | 940 ab | 3207 ab  |
|                                       | Std Error | 53.6                                               | 205.3   | 2.9    | 121.3  | 1.3     | 39.3   | 7.9  | 62.9    | 0.7    | 1.7  | 13.5   | 1.0    | 62.9    | 1.9  | 265.2  | 791.6    |
| Surround®WP                           | Average   | 91 ab                                              | 473 abc | 4.9 ab | 213 ab | 3.0 abc | 153 ab | 32.0 | 258 abc | 6.6 a  | 9.4  | 61 abc | 1.8 ab | 180 c   | 3.5  | 565 ab | 2055 abc |
|                                       | Std Error | 25.4                                               | 82.7    | 1.4    | 40.4   | 0.7     | 35.7   | 6.2  | 53.6    | 1.1    | 0.6  | 2.9    | 0.5    | 43.2    | 0.5  | 66.9   | 357.5    |
| TiO <sub>2</sub> <sup>a</sup>         | Average   | 43 b                                               | 375 abc | 2.1 ab | 162 ab | 1.8 c   | 112 ab | 25.9 | 183 abc | 8.8 a  | 10.2 | 63 abc | 0.8 ab | 166 c   | 2.1  | 426 ab | 1582 bc  |
|                                       | Std Error | 12.1                                               | 67.6    | 0.7    | 40.1   | 0.4     | 24.6   | 4.7  | 42.9    | 2.5    | 2.1  | 17.0   | 0.1    | 31.6    | 0.3  | 62.3   | 300.2    |
| <i>P</i>                              |           | 0.004                                              | 0.001   | 0.010  | 0.002  | <0.001  | 0.007  | ns   | 0.002   | 0.069  | ns   | 0.001  | 0.017  | <0.001  | ns   | 0.002  | 0.001    |

Values are means and standard errors of three replicates ( $n = 3$ ) measured as syringol glucose-glucoside equivalents; Different letters within columns indicate statistically significant differences between treatment means ( $P = 0.05$ , one-way ANOVA); ns = not significant; Control (uncoated/no VP exposure) is not included in the statistical analysis and values listed are for a single replicate; Sy = syringol; Gu = guaiacol; Ph = phenol; Cr = cresol; GG = glucose-glucoside (gentiobioside); PG = pentose-glucoside; RG = rutinoside; MG = monoglucoside.

<sup>a</sup>Applied in Raynox®; VP = volatile phenol.

**Table S5.** Concentrations of volatile phenols ( $\mu\text{g/kg}$ ) in Shiraz grape homogenates after grapes were covered with various surface coatings and exposed to gaseous volatile phenols for 60 hours.

| Treatment                         | Concentration ( $\mu\text{g/kg}$ ) |                  |                  |               | Total           |
|-----------------------------------|------------------------------------|------------------|------------------|---------------|-----------------|
|                                   | Guaiacol                           | <i>o</i> -Cresol | <i>m</i> -Cresol | Syringol      |                 |
| Control (uncoated/no VP exposure) | 4                                  | <1               | <1               | 4             | 8               |
| Control (uncoated/VP exposed)     | 13 $\pm$ 4.3                       | 31 $\pm$ 9.3     | 7 $\pm$ 1.9      | <2            | 51 $\pm$ 15.9   |
| Biopest®                          | 76 $\pm$ 36.7                      | 165 $\pm$ 67.7   | 37 $\pm$ 15.0    | 6 $\pm$ 3.1   | 284 $\pm$ 121.9 |
| Carbon <sup>a</sup>               | 121 $\pm$ 15.9                     | 129 $\pm$ 20.3   | 37 $\pm$ 6.5     | 2.7 $\pm$ 1.5 | 290 $\pm$ 43.9  |
| Deccoshield®                      | 13 $\pm$ 4.1                       | 33 $\pm$ 10.0    | 7 $\pm$ 1.8      | <2            | 53 $\pm$ 16.5   |
| Ecoprotector®                     | 41 $\pm$ 5.2                       | 101 $\pm$ 16.4   | 24 $\pm$ 4.7     | 4.3 $\pm$ 1.5 | 170 $\pm$ 27.2  |
| Envy                              | 18 $\pm$ 5.2                       | 51 $\pm$ 17.5    | 10 $\pm$ 2.3     | 2 $\pm$ 0.9   | 81 $\pm$ 24.2   |
| Fruit drying oil                  | 160 $\pm$ 109.0                    | 239 $\pm$ 135.3  | 55 $\pm$ 32.9    | 6.3 $\pm$ 3.4 | 460 $\pm$ 280.4 |
| Parka Plus                        | 92 $\pm$ 27.4                      | 179 $\pm$ 44.8   | 41 $\pm$ 10.3    | 6 $\pm$ 0.6   | 318 $\pm$ 82.1  |
| Peratec                           | 36 $\pm$ 10.2                      | 81 $\pm$ 15.6    | 19 $\pm$ 5.6     | 5 $\pm$ 2.0   | 141 $\pm$ 33.0  |
| Raynox®                           | 22 $\pm$ 3.9                       | 54 $\pm$ 12.7    | 11 $\pm$ 2.9     | 3.7 $\pm$ 0.9 | 91 $\pm$ 19.9   |
| Silicone oil                      | 22 $\pm$ 5.5                       | 53 $\pm$ 13.6    | 11 $\pm$ 2.3     | 3.3 $\pm$ 0.3 | 89 $\pm$ 21.1   |
| Surround®WP                       | 21 $\pm$ 5.8                       | 46 $\pm$ 10.2    | 10 $\pm$ 2.1     | 2.7 $\pm$ 0.7 | 80 $\pm$ 18.6   |
| Titanium dioxide <sup>a</sup>     | 30 $\pm$ 4.5                       | 67 $\pm$ 6.0     | 15 $\pm$ 1.5     | 3.7 $\pm$ 0.3 | 116 $\pm$ 11.7  |
| <i>P</i>                          | ns                                 | ns               | ns               | ns            | ns              |

Values are means  $\pm$  standard error of three replicates ( $n = 3$ ); Different letters within columns indicate statistically significant differences between treatment means ( $P = 0.05$ , one-way ANOVA); ns = not significant; Control (uncoated/no VP exposure) is not included in the statistical analysis and values listed are for a single replicate; <sup>a</sup>Applied in Raynox®; VP = volatile phenol.

**Table S6.** Concentrations of phenolic glycosides ( $\mu\text{g/kg}$ ) in Shiraz grape homogenates after grapes were covered with various surface coatings and exposed to gaseous volatile phenols for 60 hours

|                                       |           | Concentration ( $\mu\text{g/kg}$ SyGG equivalents) |          |        |         |      |         |      |        |        |       |         |          |         |      |        |        |
|---------------------------------------|-----------|----------------------------------------------------|----------|--------|---------|------|---------|------|--------|--------|-------|---------|----------|---------|------|--------|--------|
| Treatment                             |           | SyGG                                               | GuGG     | PhGG   | CrGG    | SyPG | GuPG    | PhPG | CrPG   | GuRG   | PhRG  | CrRG    | SyMG     | GuMG    | PhMG | CrMG   | Total  |
| Control (uncoated/<br>no VP exposure) |           | <1                                                 | 15       | <1     | <1      | 1    | 74      | 13   | 11     | 2      | <1    | 5       | <1       | <1      | <1   | <1     | 121    |
| Control (uncoated/<br>VP exposed)     | Average   | 6.3 ab                                             | 360 d    | 1.0 ab | 105 c   | 1.7  | 105 cd  | 33 a | 197 bc | 24 bc  | 21 ab | 218 bc  | 0.4 cd   | 32 d    | 1.0  | 255 bc | 1360 b |
|                                       | Std Error | 0.5                                                | 85.4     | 0.1    | 19.4    | 0.1  | 6.2     | 2.0  | 18.6   | 6.3    | 6.1   | 51.4    | 0.1      | 8.4     | 0.3  | 65.0   | 256.4  |
| Biopest®                              | Average   | 40.3 a                                             | 1519 abc | 2.9 ab | 445 ab  | 2.1  | 184 bc  | 39 a | 418 ab | 65 abc | 34 ab | 466 ab  | 1.2 ab   | 146 abc | 1.7  | 1051 a | 4415 a |
|                                       | Std Error | 17.2                                               | 410.4    | 0.9    | 120.4   | 0.3  | 21.4    | 5.4  | 91.9   | 15.5   | 3.7   | 101.0   | 0.3      | 7.0     | 0.5  | 58.8   | 831.3  |
| Carbon <sup>a</sup>                   | Average   | 0.5 b                                              | 141 d    | 0.5 b  | 37 c    | 1.4  | 76 d    | 26 a | 77 c   | 12 c   | 15 b  | 88 c    | 0.2 d    | 11 d    | 0.7  | 92 c   | 578 b  |
|                                       | Std Error | 0.4                                                | 17.7     | 0.0    | 6.2     | 0.1  | 6.2     | 1.4  | 3.5    | 2.3    | 3.1   | 19.2    | 0.03     | 1.5     | 0.3  | 15.6   | 62.3   |
| Deccoshield®                          | Average   | 6.9 ab                                             | 483 cd   | 0.9 ab | 166 bc  | 1.9  | 123 cd  | 34 a | 245 bc | 31 bc  | 27 ab | 298 bc  | 0.4 cd   | 41 d    | 0.8  | 361 bc | 1820 b |
|                                       | Std Error | 3.1                                                | 129.2    | 0.2    | 45.6    | 0.2  | 8.1     | 1.0  | 39.2   | 9.0    | 4.6   | 66.2    | 0.1      | 12.0    | 0.1  | 85.3   | 398.3  |
| Ecoprotector®                         | Average   | 15.1 ab                                            | 697 bcd  | 1.4 ab | 206 abc | 1.7  | 139 bcd | 36 a | 302 bc | 44 bc  | 30 ab | 361 abc | 0.7 abcd | 63 c    | 1.2  | 495 bc | 2393 b |
|                                       | Std Error | 6.1                                                | 55.0     | 0.3    | 22.3    | 0.2  | 2.3     | 1.7  | 25.3   | 3.6    | 3.1   | 30.9    | 0.2      | 14.9    | 0.5  | 105.4  | 249.3  |
| Envy                                  | Average   | 10.6 ab                                            | 482 cd   | 1.2 ab | 138 c   | 1.8  | 120 cd  | 33 a | 226 bc | 31 bc  | 22 ab | 241 bc  | 0.5 bcd  | 40 d    | 0.5  | 314 bc | 1662 b |
|                                       | Std Error | 4.6                                                | 152.9    | 0.3    | 43.8    | 0.1  | 22.1    | 5.1  | 66.9   | 6.3    | 1.2   | 34.7    | 0.1      | 4.1     | 0.2  | 28.1   | 362.6  |
| Fruit drying oil                      | Average   | 34.5 ab                                            | 2133 a   | 2.5 ab | 468 a   | 2.2  | 300 a   | 42 a | 600 a  | 115 a  | 36 a  | 656 a   | 0.9 abc  | 218 a   | 1.3  | 998 a  | 5607 a |
|                                       | Std Error | 12.2                                               | 498.4    | 0.6    | 90.6    | 0.3  | 23.0    | 6.8  | 80.6   | 24.9   | 4.9   | 111.6   | 0.2      | 50.1    | 0.4  | 166.4  | 1003.3 |
| Parka Plus                            | Average   | 42.6 a                                             | 1773 ab  | 3.0 a  | 439 ab  | 2.3  | 215 b   | 34 a | 443 ab | 72 ab  | 26 ab | 477 ab  | 1.4 a    | 159 ab  | 1.4  | 1014 a | 4703 a |
|                                       | Std Error | 10.7                                               | 277.4    | 0.6    | 97.8    | 0.4  | 10.1    | 1.9  | 33.4   | 16.1   | 4.4   | 109.0   | 0.2      | 32.2    | 0.1  | 125.4  | 695.6  |
| Peratec                               | Average   | 20.0 ab                                            | 814 bcd  | 1.6 ab | 240 abc | 1.9  | 151 bcd | 34 a | 308 bc | 52 bc  | 31 ab | 364 abc | 0.7 abcd | 74 bcd  | 1.0  | 527 b  | 2620 b |
|                                       | Std Error | 3.3                                                | 123.9    | 0.2    | 55.8    | 0.1  | 32.5    | 4.2  | 79.2   | 4.4    | 4.2   | 30.6    | 0.1      | 17.6    | 0.3  | 117.6  | 444.5  |
| Raynox®                               | Average   | 12.2 ab                                            | 493 cd   | 1.2 ab | 141 c   | 1.8  | 129 cd  | 34 a | 255 bc | 32 bc  | 25 ab | 305 bc  | 0.5 bcd  | 47 d    | 0.8  | 380 bc | 1858 b |
|                                       | Std Error | 1.8                                                | 99.5     | 0.1    | 22.7    | 0.1  | 7.2     | 5.9  | 51.1   | 2.3    | 2.9   | 26.7    | 0.1      | 7.9     | 0.2  | 14.1   | 195.7  |
| Silicone oil                          | Average   | 13.0 ab                                            | 615 cd   | 1.3 ab | 181 abc | 1.6  | 147 bcd | 43 a | 283 bc | 34 bc  | 24 ab | 281 bc  | 0.4 cd   | 42 d    | 0.8  | 331 bc | 1998 b |
|                                       | Std Error | 3.3                                                | 69.2     | 0.2    | 22.5    | 0.2  | 6.0     | 1.9  | 37.4   | 5.9    | 2.8   | 44.8    | 0.1      | 5.1     | 0.2  | 46.9   | 234.7  |
| Surround®WP                           | Average   | 7.3 ab                                             | 451 cd   | 0.9 ab | 133 c   | 1.7  | 110 cd  | 32 a | 184 bc | 24 bc  | 19 ab | 229 bc  | 0.3 cd   | 34 d    | 0.6  | 285 bc | 1512 b |
|                                       | Std Error | 0.5                                                | 22.1     | 0.1    | 9.2     | 0.2  | 11.7    | 3.5  | 24.6   | 1.1    | 0.7   | 7.9     | 0.1      | 2.1     | 0.1  | 9.5    | 40.4   |
| TiO <sub>2</sub> <sup>a</sup>         | Average   | 13.5 ab                                            | 673 cd   | 1.2 ab | 184 abc | 1.8  | 142 bcd | 36 a | 302 bc | 38 bc  | 24 ab | 313 bc  | 0.5 cd   | 61 cd   | 1.1  | 493 bc | 2284 b |
|                                       | Std Error | 2.3                                                | 62.6     | 0.1    | 22.6    | 0.1  | 16.6    | 4.4  | 41.6   | 9.0    | 3.5   | 49.0    | 0.1      | 10.3    | 0.1  | 59.3   | 210.8  |
| <i>P</i>                              |           | 0.003                                              | <0.001   | 0.002  | <0.001  | ns   | <0.001  | ns   | <0.001 | <0.001 | 0.026 | <0.001  | <0.001   | <0.001  | ns   | <0.001 | <0.001 |

Values are means and standard errors of three replicates ( $n = 3$ ) measured as syringol glucose-glucoside equivalents; Different letters within columns indicate statistically significant differences between treatment means ( $P = 0.05$ , one-way ANOVA); ns = not significant; Control (uncoated/no VP exposure) is not included in the statistical analysis and values listed are for a single replicate. Sy = syringol; Gu = guaiacol; Ph = phenol; Cr = cresol; GG = glucose-glucoside (gentiobioside); PG = pentose-glucoside; RG = rutinoside; MG = monoglucoside. <sup>a</sup>Applied in Raynox®; VP = volatile phenol.

**Table S7.** Correlations between the concentrations guaiacol, *o*-cresol, *p*-cresol, total volatile phenols and various aglycone groups of glycosides and total glycosides contained in Muscat Gordo and Shiraz grape homogenates after grapes were covered in various surface coatings and exposed to volatile phenols for 60 hours

|                                           | guaiacol | <i>o</i> -cresol | <i>p</i> -cresol | total Sy glycosides | total Gu glycosides | total Ph glycosides | total Cr glycosides | total glycosides |
|-------------------------------------------|----------|------------------|------------------|---------------------|---------------------|---------------------|---------------------|------------------|
| <b><i>Muscat Gordo (Experiment 1)</i></b> |          |                  |                  |                     |                     |                     |                     |                  |
| <i>o</i> -cresol                          | 0.968    |                  |                  |                     |                     |                     |                     |                  |
| <i>p</i> -cresol                          | 0.972    | 0.981            |                  |                     |                     |                     |                     |                  |
| total Sy glycosides                       | 0.521    | 0.619            | 0.657            |                     |                     |                     |                     |                  |
| total Gu glycosides                       | 0.737    | 0.832            | 0.771            | 0.685               |                     |                     |                     |                  |
| total Ph glycosides                       | 0.525    | 0.562            | 0.548            | 0.709               | 0.737               |                     |                     |                  |
| total Cr glycosides                       | 0.718    | 0.806            | 0.758            | 0.763               | 0.964               | 0.838               |                     |                  |
| total glycosides                          | 0.730    | 0.823            | 0.774            | 0.761               | 0.985               | 0.812               | 0.995               |                  |
| total VPs                                 | 0.983    | 0.997            | 0.989            | 0.608               | 0.806               | 0.556               | 0.785               | 0.800            |
| <b><i>Muscat Gordo (Experiment 2)</i></b> |          |                  |                  |                     |                     |                     |                     |                  |
| <i>o</i> -cresol                          | 0.945    |                  |                  |                     |                     |                     |                     |                  |
| <i>p</i> -cresol                          | 0.944    | 0.993            |                  |                     |                     |                     |                     |                  |
| total Sy glycosides                       | 0.288    | 0.426            | 0.449            |                     |                     |                     |                     |                  |
| total Gu glycosides                       | 0.653    | 0.748            | 0.733            | 0.757               |                     |                     |                     |                  |
| total Ph glycosides                       | 0.400    | 0.521            | 0.527            | 0.792               | 0.814               |                     |                     |                  |
| total Cr glycosides                       | 0.582    | 0.704            | 0.701            | 0.845               | 0.976               | 0.875               |                     |                  |
| total glycosides                          | 0.604    | 0.717            | 0.711            | 0.830               | 0.989               | 0.862               | 0.997               |                  |
| total VPs                                 | 0.975    | 0.994            | 0.991            | 0.389               | 0.724               | 0.489               | 0.673               | 0.688            |
| <b><i>Shiraz</i></b>                      |          |                  |                  |                     |                     |                     |                     |                  |
| <i>o</i> -cresol                          | 0.975    |                  |                  |                     |                     |                     |                     |                  |
| <i>p</i> -cresol                          | 0.975    | 0.996            |                  |                     |                     |                     |                     |                  |
| total Sy glycosides                       | 0.478    | 0.607            | 0.618            |                     |                     |                     |                     |                  |
| total Gu glycosides                       | 0.731    | 0.798            | 0.795            | 0.878               |                     |                     |                     |                  |
| total Ph glycosides                       | 0.157    | 0.255            | 0.243            | 0.610               | 0.619               |                     |                     |                  |
| total Cr glycosides                       | 0.602    | 0.703            | 0.698            | 0.906               | 0.968               | 0.714               |                     |                  |
| total glycosides                          | 0.671    | 0.756            | 0.752            | 0.901               | 0.992               | 0.675               | 0.992               |                  |
| total VPs                                 | 0.990    | 0.997            | 0.995            | 0.566               | 0.777               | 0.218               | 0.669               | 0.728            |

Sy = syringol; Gu = guaiacol; Ph = phenol; Cr = cresol; Total Sy glycosides = sum of SyGG, SyPG and SyMG; Total Gu glycosides = sum of GuGG, GuPG, GuRG and GuMG; Total Ph glycosides = sum of PhGG, PhPG, PhRG and PhMG; Total Cr glycosides = CrGG, CrPG, CrRG and CrMG; Total glycosides = sum of all glycosides (n=15); GG = glucose-glucoside (gentiobioside); PG = pentose-glucoside; RG = rutinoside; MG = monoglucoside.



**Table S8.** Percentage compared to the control for the most abundant phenolic glycosides in Muscat Gordo grape homogenates after grapes were covered with various surface coatings and exposed to gaseous volatile phenols for 60 hours (Experiment 1)

| Sample                        | % to the control |      |      |      |      |      |      |      |      |
|-------------------------------|------------------|------|------|------|------|------|------|------|------|
|                               | SyGG             | GuGG | CrGG | GuPG | PhPG | CrPG | CrRG | GuMG | CrMG |
| Control (uncoated)            | 100              | 100  | 100  | 100  | 100  | 100  | 100  | 100  | 100  |
| Biopest®                      | 171              | 292  | 306  | 176  | 121  | 152  | 224  | 243  | 232  |
| Carbon <sup>a</sup>           | 27               | 67   | 71   | 70   | 73   | 71   | 50   | 58   | 58   |
| Deccoshield®                  | 125              | 114  | 130  | 125  | 145  | 156  | 142  | 99   | 124  |
| Ecoprotector®                 | 225              | 227  | 248  | 146  | 151  | 159  | 197  | 142  | 181  |
| Envy                          | 100              | 102  | 98   | 86   | 98   | 91   | 97   | 63   | 87   |
| Fruit drying oil              | 169              | 323  | 348  | 195  | 188  | 219  | 272  | 193  | 227  |
| Parka Plus                    | 197              | 214  | 296  | 135  | 111  | 153  | 184  | 167  | 179  |
| Peratec                       | 221              | 112  | 167  | 149  | 150  | 144  | 187  | 172  | 181  |
| Raynox®                       | 117              | 141  | 179  | 131  | 117  | 144  | 150  | 133  | 130  |
| Silicone oil                  | 141              | 124  | 137  | 118  | 139  | 127  | 148  | 137  | 130  |
| Surround®WP                   | 190              | 151  | 182  | 96   | 105  | 107  | 149  | 111  | 131  |
| Titanium dioxide <sup>a</sup> | 56               | 74   | 90   | 99   | 90   | 102  | 89   | 78   | 81   |

Values are means of three replicates (n = 3); Sy = syringol; Gu = guaiacol; Ph = phenol; Cr = cresol; GG = glucose-glucoside (gentiobioside); PG = pentose-glucoside; RG = rutinoside; MG = monoglucoside.

<sup>a</sup>Applied in Raynox®

**Table S9.** Percentage compared to the control for the most abundant phenolic glycosides in Muscat Gordo grape homogenates after grapes were covered with various surface coatings and exposed to gaseous volatile phenols for 60 hours (Experiment 2)

| Sample                        | % to the control |      |      |      |      |      |      |      |      |
|-------------------------------|------------------|------|------|------|------|------|------|------|------|
|                               | SyGG             | GuGG | CrGG | GuPG | PhPG | CrPG | CrRG | GuMG | CrMG |
| Control (uncoated)            | 100              | 100  | 100  | 100  | 100  | 100  | 100  | 100  | 100  |
| Biopest®                      | 176              | 239  | 274  | 315  | 185  | 262  | 195  | 364  | 280  |
| Carbon <sup>a</sup>           | 38               | 75   | 93   | 95   | 104  | 83   | 67   | 119  | 100  |
| Deccoshield®                  | 163              | 131  | 167  | 177  | 170  | 186  | 130  | 149  | 152  |
| Ecoprotector®                 | 160              | 148  | 191  | 204  | 171  | 194  | 159  | 238  | 202  |
| Envy                          | 110              | 98   | 111  | 151  | 151  | 128  | 125  | 116  | 116  |
| Fruit drying oil              | 168              | 294  | 311  | 256  | 198  | 245  | 208  | 201  | 266  |
| Parka Plus                    | 301              | 288  | 381  | 283  | 201  | 283  | 218  | 319  | 323  |
| Peratec                       | 151              | 115  | 141  | 125  | 129  | 138  | 117  | 163  | 159  |
| Raynox®                       | 224              | 162  | 182  | 186  | 175  | 185  | 162  | 181  | 195  |
| Silicone oil                  | 316              | 249  | 306  | 244  | 181  | 247  | 230  | 262  | 288  |
| Surround®WP                   | 175              | 155  | 187  | 197  | 176  | 207  | 127  | 152  | 173  |
| Titanium dioxide <sup>a</sup> | 82               | 123  | 143  | 144  | 143  | 147  | 131  | 141  | 130  |

Values are means of three replicates (n = 3); Sy = syringol; Gu = guaiacol; Ph = phenol; Cr = cresol; GG = glucose-glucoside (gentiobioside); PG = pentose-glucoside; RG = rutinoside; MG = monoglucoside.

<sup>a</sup>Applied in Raynox®

**Table S10.** Percentage compared to the control for the most abundant phenolic glycosides in Shiraz grape homogenates after grapes were covered with various surface coatings and exposed to gaseous volatile phenols for 60 hours

|                               | % to the control |      |      |      |      |      |      |      |      |
|-------------------------------|------------------|------|------|------|------|------|------|------|------|
| Sample                        | SyGG             | GuGG | CrGG | GuPG | PhPG | CrPG | CrRG | GuMG | CrMG |
| Control (uncoated)            | 100              | 100  | 100  | 100  | 100  | 100  | 100  | 100  | 100  |
| Biopest®                      | 636              | 422  | 423  | 176  | 117  | 212  | 214  | 460  | 412  |
| Carbon <sup>a</sup>           | 8                | 39   | 36   | 72   | 77   | 39   | 40   | 34   | 36   |
| Deccoshield®                  | 109              | 134  | 158  | 117  | 103  | 125  | 137  | 129  | 141  |
| Ecoprotector®                 | 239              | 194  | 196  | 133  | 108  | 153  | 165  | 198  | 194  |
| Envy                          | 168              | 134  | 132  | 114  | 98   | 115  | 110  | 127  | 123  |
| Fruit drying oil              | 545              | 593  | 445  | 286  | 125  | 305  | 300  | 688  | 391  |
| Parka Plus                    | 673              | 493  | 418  | 205  | 102  | 225  | 218  | 502  | 397  |
| Peratec                       | 315              | 226  | 228  | 144  | 101  | 157  | 167  | 233  | 207  |
| Raynox®                       | 193              | 137  | 134  | 123  | 102  | 129  | 140  | 148  | 149  |
| Silicone oil                  | 206              | 171  | 172  | 141  | 131  | 144  | 129  | 131  | 130  |
| Surround®WP                   | 115              | 125  | 126  | 105  | 97   | 93   | 105  | 107  | 111  |
| Titanium dioxide <sup>a</sup> | 213              | 187  | 175  | 136  | 109  | 153  | 143  | 193  | 193  |

Values are means of three replicates (n = 3); Sy = syringol; Gu = guaiacol; Ph = phenol; Cr = cresol; GG = glucose-glucoside (gentiobioside); PG = pentose-glucoside; RG = rutinoid; MG = monoglucoside.

<sup>a</sup>Applied in Raynox®
